# 1 Experiences of Indigenous peoples living with pelvic health conditions: A scoping review

2

3 Kaeleigh Brown\*<sup>1</sup>, Katherine Choi<sup>2</sup>, Esther Kim<sup>3</sup>, Sandra M Campbell<sup>4</sup>, Jane Schulz<sup>5</sup>, Pertice Moffitt<sup>6</sup>,

4 Susan Chatwood<sup>1,3</sup>

5 <sup>1</sup>University of Alberta School of Public Health, Edmonton, Alberta, Canada

6 <sup>2</sup> Government of Nunavut, Iqaluit, Nunavut, Canada

7 <sup>3</sup> Institute for Circumpolar Health Research, Yellowknife, Northwest Territories, Canada

8 <sup>4</sup> University of Alberta Libraries, Edmonton, Alberta, Canada

9 <sup>5</sup> University of Alberta Faculty of Medicine & Dentistry, Edmonton, Alberta, Canada

10 <sup>6</sup> Aurora Research Institute, Yellowknife, Northwest Territories, Canada

11

12 \*Corresponding author

13 Email: [kaeleigh@ualberta.ca](mailto:kaeleigh@ualberta.ca) (KB)

14 Kaeleigh Brown ORCID <https://orcid.org/0000-0002-6743-9486>

## 15 Authors' contributions

16 KB conceptualized the study. SMC developed the search strategies for both pelvic health conditions and

17 Indigenous populations, ran the online database searches, and imported the results into Covidence. KC

18 and EK screened the results and participated in data extraction. SC, PM, and JS reviewed and

19 contributed to the pelvic health conditions list used to develop the search strategies. SC supervised the

20 study. All authors contributed to reviewing and editing the submitted manuscript.

## 21 **Abstract**

22 Background - Pelvic health conditions significantly impact quality of life and are prevalent in the general  
23 population. Urinary and fecal incontinence, pelvic organ prolapse, and pelvic pain are examples of pelvic  
24 health conditions. A scoping review was conducted to understand what is currently known about pelvic  
25 health conditions experienced by Indigenous populations worldwide. To date, no such review has been  
26 reported.

27 Methods - A scoping review methodology was used. In June 2023, a search was conducted, and then  
28 updated in February 2024, capturing both primary and grey literature. An iterative process of abstract  
29 and full text screening was conducted by two reviewers before proceeding to data extraction. Inclusion  
30 criteria focused on English publications and reports of pelvic health conditions experienced by  
31 Indigenous peoples. Data was collected in Google Sheets, and then underwent descriptive statistical  
32 analysis. Publications that provided qualitative data were analyzed using thematic analysis.

33 Results – A total of 203 publications were included in the analysis. Several patterns emerged regarding  
34 publication region, gender and age representation, pelvic health conditions reported, and  
35 representation of Indigenous peoples. Notable gaps were a lack of publications from China, Russia, and  
36 Nordic countries, minimal representation of gender diverse populations, few publications reporting on  
37 auto-immune and bowel conditions, and limited mention of trauma-informed and culturally safe  
38 approaches.

39 Conclusions – This study highlights gaps in the current literature around gender representation, bowel  
40 and auto-immune conditions, regional representation, and the use of safety frameworks, which may  
41 inform future research initiatives. It also summarizes the existing literature, which may inform clinical  
42 and health system-level decision making.

## 43 Introduction

44 To date, there has been no published review of pelvic health conditions experienced by Indigenous  
45 populations. The purpose of this scoping review is to describe what is currently known about Indigenous  
46 peoples' experiences with pelvic health conditions by asking the question: "What does the literature say  
47 about pelvic health conditions experienced by Indigenous populations worldwide?". Where there is a  
48 need for exploratory work in this area, we decided a scoping review method was best suited. This  
49 scoping review will identify gaps and patterns in the existing literature and provide recommendations  
50 for future research and practice [1].

51 The United Nations (UN) estimates that there are at least 370 million Indigenous peoples across the  
52 globe [2]. Indigenous peoples is a broad term used to describe the original inhabitants of a region prior  
53 to the arrival of other peoples [2]. To increase understanding of the term "indigenous", the UN outlines  
54 several criteria, rather than offering an official definition. These criteria include: self-identification,  
55 relationships with the land, association with pre-colonial/settler societies, distinct knowledges (e.g.,  
56 culture, language, social systems), belonging to non-dominant groups of society, and commitment to  
57 continue as "distinctive peoples and communities" [2]. Indigenous peoples experience barriers to health  
58 service access [3,4], and poorer health outcomes than non-Indigenous counterparts [5–9]. There have  
59 been calls from national [5,10,11] and international [12,13] fronts to address these attitudes and  
60 inequities.

61 The pelvic floor includes interconnections between many body systems which are housed within the  
62 bony pelvis. These structures are supported by connective tissue, ligaments, and the pelvic floor  
63 muscles. When there is a change in these supporting structures, whether due to aging, pregnancy and  
64 childbirth, nervous system sensitivity, or pathology, an individual may experience symptoms of a pelvic  
65 health condition. Symptoms of pelvic health conditions in men include erectile dysfunction, in women

66 include protrusion of pelvic organs (prolapse), and in both genders include urinary or bowel  
67 incontinence/urgency/frequency or pain (with voiding, defecation, or intercourse). Several treatment  
68 options exist for pelvic health conditions, including medication, pelvic floor rehabilitation, surgery,  
69 continence products, pessaries, and behavioural modifications.

70 These conditions are prevalent in the general population [14–18] and the number of individuals affected  
71 is expected to increase [19]. The existing literature demonstrates varying prevalence rates across  
72 race/ethnicity [20,21], particularly with an over-representation of White people and an under-  
73 representation of Indigenous people and people of colour in pelvic health research [22–24]. This may  
74 have impacts on clinical decision making and generalizability of research results [22–24].

## 75 **Methods**

76 We selected a scoping review methodology to systematically search and analyze the existing literature  
77 on pelvic health conditions experienced by Indigenous peoples worldwide. This methodology was a  
78 good fit for the topic, since it has yet to be systematically explored, and because the scope of the  
79 research question was broadened beyond interventional studies [25]. Although our search strategy was  
80 developed in advance, we did not register the scoping review protocol. Several authors have explored  
81 and further defined scoping review methodology (see Arksey & O'Malley [25], Levac et al [26], and  
82 Bradbury-Jones et al [1]). Our review was informed by all three publications.

## 83 **Search Strategy**

84 A search was executed by an expert searcher/health librarian (SMC) from the University of Alberta,  
85 Edmonton, Canada, on the following databases: PROSPERO, OVID Medline, OVID EMBASE, OVID Global  
86 Health, Wiley Cochrane Library (CDSR and Central), EBSCO CINAHL, Proquest Dissertations and Theses

87 Global and SCOPUS using controlled vocabulary (eg: MeSH, Emtree, etc) and key words representing  
88 the concepts "pelvic health conditions", "Indigenous People". Variants of search filters were applied for  
89 "Indigenous People" [27–40]. Search terms for pelvic health conditions were informed by the  
90 International Continence Society's Incontinence, 6th Edition [41], the first author's (KB) clinical  
91 experience, and by a practicing gynecologist (JS). Searches were adjusted for each database. No limits  
92 were applied. Databases were searched from inception to mid-February 2024. Detailed search strategies  
93 are available in **S1 Appendix**.

94 Reference lists of the included full texts were also searched to identify any articles that may meet the  
95 inclusion criteria. In one case [22], the corresponding author was contacted to acquire a list of citations  
96 used in their analysis. Additionally, hand searching of key journals (BMC Women's Health, Journal of  
97 Women's & Pelvic Health Physical Therapy, and International Urogynecology Journal) was conducted  
98 from inception to January 31, 2024. Two organization websites (World Health Organization and  
99 International Continence Society) and an internet search engine (DuckDuckGo) were also searched to  
100 identify additional resources from the media, organizations, and conference presentations.

101 Once the results were uploaded to Covidence [42], two rounds of review were conducted by two  
102 reviewers (either KB and KC, or KB and EK): first screening the abstracts and titles, followed by screening  
103 the included full text resources. Screening criteria for each round are outlined in **Table 1**. If there was a  
104 discrepancy between the two reviewers, they met to discuss and come to a consensus on whether to  
105 exclude or proceed with inclusion. This was an iterative process, where reviewers modified the  
106 screening criteria based on the search results, and during data collection, where the co-authors  
107 identified literature that did not meet the inclusion criteria and were subsequently excluded.

### **Table 1 - Scoping review inclusion and exclusion criteria**

#### **Abstract Review**

##### *Inclusion Criteria*

|                                                                                                                                                  |                                       |
|--------------------------------------------------------------------------------------------------------------------------------------------------|---------------------------------------|
| Title and/or abstract written in English                                                                                                         |                                       |
| Pelvic health condition and/or urological condition and/or gynecological condition and/or anorectal condition mentioned in title and/or abstract |                                       |
| Indigenous people/population mentioned in title and/or abstract                                                                                  |                                       |
| <b>Full Text Review</b>                                                                                                                          |                                       |
| <i>Inclusion Criteria</i>                                                                                                                        | <i>Exclusion Criteria</i>             |
| Full text in English                                                                                                                             | No report of Indigenous population    |
| Indigenous population reported AND their experience/prevalence/etc. with pelvic health condition also reported                                   | No report of pelvic health condition  |
|                                                                                                                                                  | Unable to access or acquire full text |

108

## 109 Data Collection

110 Data extraction, also known as charting the data [25], is an iterative process, which evolves as the  
111 reviewers become more familiar with the literature [26]. To ensure extraction was consistent between  
112 reviewers, KB, KC and EK extracted data from up to ten articles, and then met to share their findings  
113 [26]. Any discrepancies or disagreements were discussed between reviewers. Data extraction continued,  
114 and a Google Sheets spreadsheet used to collate the results. Additional meetings between reviewers  
115 occurred ad hoc, to ensure data extraction was responsive to the literature. The extracted data  
116 included: population demographics (e.g., age, parity, medical history), population socioeconomic  
117 factors, publication characteristics, region information (e.g., country, targeted recruitment of Indigenous  
118 peoples), pelvic floor information (e.g., epidemiology, conditions reported, interventions, help-seeking  
119 behaviours, described experiences with pelvic health conditions), and safety information (cultural safety,  
120 trauma-informed approach). These headings were developed from an existing template used in previous  
121 scoping reviews by the final author (SC), and then modified to reflect the pelvic health and Indigenous  
122 health literature.

123 Indigenous people have experienced and continue to experience discrimination and harm in healthcare  
124 and research [6]. Culturally safe and trauma-informed practices have been proposed to improve safety  
125 in healthcare situations. We believed it was important to include headings for cultural safety and  
126 trauma-informed practices/frameworks to understand the extent of their implementation in pelvic  
127 health research with Indigenous peoples. Cultural safety is a social justice approach to healthcare based  
128 in Māori Indigenous knowledges [43,44]. It addresses power dynamics between patients and healthcare  
129 providers and has been adopted internationally [44]. The concept within healthcare has been  
130 interpreted in several ways [44], but its use within research has not been explored extensively [43].  
131 Traumatic experiences are prevalent, such as around birth and sexual trauma [45,46], and there is an  
132 association between sexual trauma and pelvic health conditions [47]. Trauma Theory suggests that  
133 traumatic experiences can affect how the body functions, including mental and physical health [48,49].  
134 By 'becoming' trauma-informed, it is assumed that adopting a trauma-informed approach will have a  
135 positive effect on service users and participants [49,50]. Trauma-informed practice is a newly evolving  
136 construct in human research, but has been used in clinical and educational practices for a number of  
137 years.

## 138 **Analysis**

139 The PAGER framework guided analysis and reporting of the literature review findings [1]. The five  
140 domains of the framework are: Patterns, Advances, Gaps, Evidence for practice, and Research  
141 recommendations. Bradbury-Jones et al [1] recommend using a patterning chart to identify trends in  
142 methodology and themes. Due to the number of included publications, we opted out of this process,  
143 and instead looked for patterns within the charted data around publication characteristics, participant  
144 demographics, regions, pelvic health conditions, Indigenous representation, and safety. Following  
145 pattern identification, we then proceeded to examine the evolution of the research – specifically looking

146 at theoretical and methodological advances [1]. To identify gaps in the literature, interconnections  
147 between themes and the current research and practice landscape were considered [1]. Evidence for  
148 practice and research recommendations were considered at the end of analysis to provide potential  
149 knowledge users with information, and guidance on what the next research steps may be [1,26].

## 150 **Results**

151 Results (2911) were exported to Covidence review management software [42], where duplicates (453)  
152 were removed. Nineteen additional duplicates were removed manually. After abstract and full text  
153 screening, a total of 243 resources were included, of which 40 were merged due to duplication of  
154 publication (e.g., same content published in several conference abstracts, or conference abstract  
155 merged with original journal article). This left 203 publications for analysis. See **Fig 1** for a summary of  
156 the study selection process, as illustrated in a Preferred Report Items for Systematic Review and Meta-  
157 Analysis (PRISMA) flow chart [51].

158 **Fig 1 – PRISMA flow chart**

## 159 **Publication Characteristics**

160 **Fig 2** provides a summary of all included studies based on region of publication. North America was  
161 represented the most (40.9% of publications), whereas the Middle East (2%) and multinational (1.5%)  
162 publications were the least represented. Notably, there were two publications from a circumpolar  
163 region (Northwest Territories, Canada; Alaska, United States of America), which includes Nordic  
164 countries, Russia, Greenland, Alaska, and the northern territories of Canada. The majority of  
165 publications were from the primary literature (74.3%) and utilized a quantitative methodology (63.1%).  
166 The proportion of Indigenous peoples in the publications varied widely, from 0-100%. The proportion of



167 Indigenous participants was reported 231 times (this is due to multiple treatment arms in interventional  
168 studies, or several Indigenous groups identified within a publication – where the total did not equal  
169 100%). As shown in **Fig 3**, the distribution of representation weighed heavily towards 100% (32% of  
170 instances), and towards <5% (28.6%).

171 **Fig 2 – Regional representation of included publications**

172 **Fig 3 – Frequency of reporting of the proportion of Indigenous participants**

173 Approximately 56% of references specifically recruited Indigenous peoples (n=114). These references  
174 were then isolated and underwent subsequent analysis. Per **Fig 2**, the distribution of publication region  
175 was highest in Australia/New Zealand (26.3%), followed by Africa (22.8%), and the Indian sub-continent  
176 (17.5%). As with the original sample, the majority of publications were from the primary literature  
177 (83%). The methodology of the publications was distributed as such: quantitative (48.2%),  
178 ethnobotanical/zoological (21.1%), qualitative (9.6%), reviews (systematic, scoping, narrative, etc. –  
179 8.8%), mixed methods (4.4%), other (1.8%). The remaining publications (6.1%) either did not report the  
180 methodology, or it was not applicable (e.g., news article). In this sample, the proportion of Indigenous  
181 participants was reported 120 times. Publications that specifically recruited Indigenous populations, and  
182 attained 100% of Indigenous participants, were in the majority (62.5%). This differed from the initial  
183 sample, as illustrated in **Fig 3**. One publication did not recruit Indigenous participants, but spoke with  
184 non-Indigenous practitioners who provided services to Indigenous peoples.

## 185 **Demographics**

186 Women/females were represented in 44.7% of publications, whereas two-spirit people were  
187 represented in <1%. Men were included in 10.5% of the publications, 28.9% included men and women,  
188 and 14.9% did not report on sex or gender or it did not apply (i.e., the publication reported on service

189 delivery for Indigenous populations). The reported age of Indigenous participants varied, both in the  
190 method of reporting (e.g., median, mean, range) and in the represented ages (children to elders).  
191 Analysis was challenging, due to this variability in reporting. We opted to aggregate the data into  
192 categories (child, youth, adult, Elder) based on our best estimate on what was reported and extracted.  
193 Not all publications reported age, leaving 79 publications for analysis. The majority (91.1%) of those  
194 publications recruited adults (ages 19-59), which includes articles that reported age ranges extending  
195 into youth (ages 12-18) and Elder (ages 60+) categories. Only 6.3% only recruited Elders, and 2.5% only  
196 recruited children (ages 0-11) or youth.

## 197 **Safety**

198 The use of trauma-informed approaches/frameworks and cultural safety practices was analyzed. Of the  
199 analyzed articles (n=114), 2.6% reported using a trauma-informed approach or framework and 25.4%  
200 mentioned the use of culturally safe practices.

## 201 **Pelvic health information**

202 Of the articles that were interventional or described treatment options (n=38), the majority (65.8%)  
203 described herbal or traditional medicines, 13.2% mentioned surgical treatment, 5.3% education, 5.3% a  
204 combination of Western and traditional medicines, and the remainder mentioned medications, multiple  
205 treatment options, social support, or did not report the intervention (2.6% each).

206 **Fig 4** visualizes the frequency of pelvic health conditions mentioned in the literature that focused  
207 specifically on Indigenous peoples. One publication did not report a pelvic health condition but spoke to  
208 pelvic health physiotherapy service delivery to Australian Indigenous peoples. It was removed from this  
209 analysis (n=113). Since many publications reported multiple pelvic health conditions, the total frequency

210 is higher than the number of publications. Bladder conditions were reported most frequently (47.1%),  
211 followed by pain conditions (18.4%), pelvic organ prolapse (11.5%), and erectile dysfunction (10.3%).

#### 212 **Fig 4 – Frequency of pelvic health conditions described in the literature**

213 We also extracted epidemiological data, including prevalence of pelvic health conditions. Reports of  
214 urinary incontinence (including stress, urge, and mixed incontinence) ranged from 3-81%, dysuria 8.1-  
215 25.6%, bladder frequency 10.4-37.3%, pelvic organ prolapse 32-90%, dyspareunia 24.4-29%,  
216 dysmenorrhea 64.7-69.3%, and erectile dysfunction 3.6-61.5%. This variability can be explained by  
217 several factors including severity of symptoms (e.g., mild vs severe erectile dysfunction, grading of pelvic  
218 organ prolapse), life course (e.g., pregnancy vs post-partum, peri- vs post-menopausal), structure  
219 causing the symptoms (e.g., uterocele, cystocele, rectocele), and symptom presentation (e.g., urge  
220 incontinence, stress incontinence, mixed incontinence). There was one report of accidental bowel  
221 leakage (fecal incontinence) experienced by 2% of older Indigenous adults [52].

#### 222 **Help-seeking and service delivery**

223 Barriers and facilitators to help-seeking and service delivery were identified in the publications. Cultural  
224 norms and traditions in some cases were facilitators to accessing treatment, such as remedies rooted in  
225 Indigenous knowledges (9 publications), or in one publication, opportunities to seek care outside of  
226 community for Indigenous men. In other cases, cultural norms were a barrier to seeking help (5  
227 publications). Privacy, gender roles and expectations, and societal perceptions were reported as limiting  
228 factors.

229 Several publications described the influence of the healthcare system and its staff, in many cases, posing  
230 a barrier to access. Service costs, location of services in relation to communities, healthcare staff  
231 attitudes and behaviour, timeliness of service, and staff competencies were reported as barriers. Two

232 publications reported efforts to facilitate access to services, either by expanding the scope of  
233 practitioners or by addressing bureaucratic barriers experienced by practitioners.

234 Finally, emotions, knowledges, and beliefs of the participants in relation to help-seeking and service  
235 delivery were also described as barriers and facilitators. Shame, shyness, stigma, embarrassment, and  
236 self-perception were barriers (7 publications). Four publications described active knowledge seeking,  
237 and participants expressing interest in accessing services or learning more about pelvic health conditions  
238 as facilitators.

### 239 **Perceptions of pelvic health conditions**

240 Similar themes regarding emotions and knowledge seeking arose around how people perceived pelvic  
241 health conditions. Unpleasant emotions such as embarrassment and shame were reported (4  
242 publications). Knowledge seeking and awareness was identified as a need (4 publications) and in some  
243 cases, was being addressed by researchers, health care providers, and Indigenous community members  
244 (5 publications).

245 Participants reported several reasons for their symptoms (6 publications), with some rooted in spiritual  
246 beliefs (3 publications). Moreover, personal, interpersonal, and societal impacts of these pelvic health  
247 conditions were described, such as leading to tension within marriages (2 publications), need for family  
248 and community support (4 publications), migration away from communities to larger centres for  
249 treatment (1 publication), loss of fertility (2 publications), reduction in quality of life (1 publication),  
250 health outcomes (2 publications), and participation in work and community (2 publications).

## 251 **Commentary on healthcare systems**

252 Functioning of the healthcare system was another theme. Experiences seeking treatment were  
253 described, many of which shared stories of system barriers and mal-treatment by healthcare providers  
254 (5 publications). Gaps in services and training were identified (5 publications). Solutions around  
255 provision of accessible and safe treatment were also described (2 publications).

## 256 **Discussion**

257 This review systematically searched the literature to understand what is currently known about pelvic  
258 health conditions experienced by Indigenous peoples worldwide. The findings of this review will be  
259 summarized and discussed within the PAGER framework proposed by Bradbury-Jones et al [1].

## 260 **Patterns**

261 Much of pelvic health literature originated from English-speaking regions – namely North America,  
262 Australia, and New Zealand. However, when we examined articles that specifically recruited Indigenous  
263 peoples, North American publications moved from most frequent to mid-range. To our knowledge,  
264 international trends around the country/region of publication origin has not been explored in the pelvic  
265 health literature.

266 Women (i.e., sex reported as female or gender reported as woman) participated in more studies than  
267 men (i.e., sex reported as male or gender reported as man) or gender diverse people. To our knowledge,  
268 there has been no study examining sex and gender representation within the pelvic health literature.  
269 This finding is not surprising, considering that pelvic health conditions such as incontinence are more  
270 prevalent in women [14,53], female specific conditions (e.g., endometriosis, pelvic organ prolapse) were

271 more frequent in our data, and that our journal hand search focused on publications relating to  
272 women's health

273 Bladder conditions were most frequently reported in the publications, whereas autoimmune diseases,  
274 bowel conditions, and fistula were least frequently reported. As in the broader literature, this review  
275 also demonstrated variability in prevalence rates of pelvic health conditions. For example, Vogel et al  
276 [15] report post-partum urinary incontinence ranging between 8-31%, Shaw et al [14] report 23.7% of  
277 Canadian adults, and Peinado-Molina et al [17] report 55.8% experienced by adult women in Spain. Our  
278 study reports urinary incontinence prevalence from 3-81%. Only one publication in our study reported  
279 the prevalence of fecal incontinence experienced by older Indigenous adults at 2% [52]. A recent  
280 systematic review and meta-analysis identified a global prevalence rate of 8.0% [54]. The prevalence of  
281 pelvic organ prolapse within the included studies (32-90%) was higher than in other publications.  
282 Palmieri et al [16] found a prevalence of 6.1% in a population of pregnant and post-partum Italian  
283 women. Other authors report a range from 3.4-10.76% in adult American women [55], 14% in adult  
284 Spanish women [17], and 22.7% in Ethiopian women [56]. Rates of dyspareunia identified in our study  
285 (24.4-29%) were higher than a sample of women from the United Kingdom at 7.5% [57], but were within  
286 the range reported by other authors who explored pregnancy and post-partum (22-44%) [58], and  
287 menopause (20-77.6%) [59].

288 Ethnobotanical and zoological studies were prevalent methodologies in the primary literature and were  
289 a high proportion of the interventional publications in this study. These publications described  
290 traditional medicine interventions for pelvic health conditions. By mentioning remedies for pelvic health  
291 conditions, the studies imply that Indigenous peoples in those groups experience symptoms, although  
292 the extent is not clear from the literature.

293 Emotional experiences such as shame, embarrassment, and stigma were reported by Indigenous  
294 peoples. These experiences were in response to having a pelvic health condition and posed a barrier to  
295 accessing support and healthcare services. There were numerous barriers to healthcare access  
296 identified, which included logistical challenges such as finances and travel requirements. Other reports  
297 of healthcare access for Indigenous peoples in Australia [4] and Canada [3] include geographic and  
298 economic barriers. We also identified pelvic health conditions' impacts on quality of life, relationships,  
299 and participation within community. This aligns with existing literature on the negative effects of  
300 prolapse [60], pelvic pain conditions [20,61], and bladder incontinence [62] on quality of life.

## 301 **Advances**

302 Representation of women is often lacking in biomedical research, and sex and gender is under-reported  
303 [63]. The majority of publications in our study reported on sex and gender. There was also a high  
304 percentage of women/female participants compared to men/males.

305 A surprising finding of this review was the number of ethnobotanical and zoological studies. These  
306 publications came from the primary literature and reported on the application of traditional knowledge  
307 within Indigenous communities to treat pelvic health conditions, by using substances derived from  
308 plants and animals. As summarized by Saini [64], Western science has been dismissive of Indigenous  
309 ways of knowing, which includes traditional medicines. Additionally, access to Western medicine can  
310 challenging, and Indigenous peoples may turn to traditional remedies, which are more accessible and  
311 align with their cultural values [65–68]. Overall, the publications in this review explored the depth of  
312 Indigenous knowledges and did not report on the efficacy of the substances.

## 313 Gaps

314 Among the regions represented in the literature, there were noticeable gaps from regions with known  
315 high proportions of Indigenous peoples. Alaska, USA and northern Canada were represented with a  
316 small number of publications. The Canadian territories of the Northwest Territories, Nunavut, and Yukon  
317 report the highest proportions of Indigenous peoples in the country, at approximately 50% [69], 86%  
318 [70], and 22% [71], respectively. Alaska is reported to have the highest proportion of American Indians  
319 and Alaska Natives in the United States of America (22%) [72]. There were also no publications from  
320 Iceland, Greenland, Norway, Sweden, Finland, Russia, several of which are known to be home to  
321 Indigenous peoples (e.g., Kalaallit from Greenland, and Sámi peoples from Norway, Sweden, Russia, and  
322 Finland). Finally, China was missing from the review, which does not recognize Indigenous populations  
323 [73].

324 Upon analysis of the reported age and gender, gaps were also revealed in terms of participant  
325 demographics. Although women were represented more in this scoping review, there was a paucity of  
326 publications relating to gender diverse Indigenous people. One publication mentioned two-spirit gender  
327 identity. Additionally, a gap exists in research concerning Indigenous children (0-12 year olds), youth  
328 (13-18 year olds), and elders (60+). Pelvic health conditions increase in prevalence as the population  
329 ages [17,54] and children and youth can experience different conditions from adults and elders (such as  
330 bedwetting and encopresis).

331 Reporting of certain pelvic health conditions, such as auto-immune diseases (like lichen sclerosis) and  
332 bowel conditions was lacking. Perhaps this is due to known underreporting of bowel conditions [74], or  
333 due to low prevalence of auto-immune conditions [75].

334 No publications investigated the economic impacts of pelvic health conditions experienced by  
335 Indigenous populations. Other publications have reported substantial costs to the general population



336 and the systems that serve it. Self-management including medications and products can range \$1400 –  
337 2100 CAD annually for a senior living with incontinence, per The Canadian Continence Foundation [76].  
338 Costs incurred by insurers and healthcare systems include medications, medical devices, personnel, and  
339 surgery [77]. Urinary incontinence alone is estimated to cost the Canadian healthcare system \$3.84  
340 billion annually [76].

341 Finally, few publications mentioned the use of cultural safety and/or trauma-informed approaches.  
342 Whether this is due to under-reporting, or under-utilization remains unclear. Limitations in the existing  
343 literature may have contributed to these results. Although used widely in healthcare settings, cultural  
344 safety within research has not been explored extensively in the existing literature [43]. Gaps also exist in  
345 the literature relating to gold standard approaches to trauma-informed research [78].

## 346 **Evidence for Practice**

347 Pelvic health conditions are prevalent in the general population. As several authors [22–24] have  
348 proposed, homogeneity and under-representation of Indigenous people and people of colour in the  
349 pelvic health literature may have consequences on clinical decision making. We argue that this may also  
350 extend to policy decisions and thereby impact service delivery to Indigenous populations. The current  
351 literature demonstrates that pelvic health conditions are experienced by Indigenous peoples at  
352 comparable prevalence rates to the general population. Recognizing that Indigenous people may live in  
353 remote regions [3,4], where delivery of health services can be challenging and costly, decision makers  
354 need to consider novel approaches to increase equity of access.

355 Discussing pelvic health conditions may be perceived as a private issue, and there may be stigma or  
356 cultural norms that health care practitioners should be aware of when working with Indigenous peoples.

357 Creating culturally safe environments within the healthcare system may be one way in which  
358 practitioners and the systems they work in can improve quality of and access to care.

## 359 **Recommendations for Research**

360 Jefferson et al [78] identified existing gaps with research best practices while working with trauma-  
361 exposed populations, and noted the under-representation of marginalized populations. The authors  
362 recommend that gold-standard research guidelines be developed, implemented, and tested, and that  
363 trauma-exposed individuals and communities participate in guideline development. We agree that  
364 additional research is needed in partnership with Indigenous peoples to develop and implement  
365 research practices that promote participant safety and are rooted in Indigenous epistemologies. This  
366 may be achieved by using culturally safe and trauma-informed approaches.

367 There were disparities in the literature in sex and gender, age, and type of pelvic health conditions  
368 reported. Since this review has demonstrated that women and females were more represented, future  
369 research in pelvic health conditions should emphasize including men and gender diverse participants.  
370 Additional research is also needed to explore the experiences of Indigenous children, youth, and Elders.  
371 Furthermore, under-studied pelvic health conditions included bowel conditions, prolapse, auto-immune  
372 disorders, and erectile dysfunction. In regions where there is an abundance of pelvic health research  
373 relating to urinary incontinence, for example, we recommend shifting focus towards these under-  
374 studied conditions.

## 375 **Limitations**

376 Mental wellness and pelvic health conditions are interrelated. Depression and/or anxiety are associated  
377 with both urinary and fecal incontinence [62,79,80], interstitial cystitis [61], and pelvic organ prolapse

378 [60]. Women reporting dyspareunia (painful intercourse) can also experience depression, and  
379 dissatisfaction or distress with their sex life [57]. We did not actively search for reports or descriptions of  
380 mental health diagnoses in our analysis, and as such can make no conclusions about Indigenous peoples'  
381 experiences with these often co-occurring experiences.

382 There are challenges developing a search string representative of Indigenous peoples globally, such as a  
383 lack of a universal definition, which leaves researchers to their own devices to develop search terms,  
384 resulting in bias and gaps in knowledge [81]. As such, we used the United Nations' description of  
385 Indigenous peoples to inform search development and screening criteria. Also, replication of previously  
386 used, but inadequate, search terms can perpetuate bias [81]. To address these challenges, and in an  
387 attempt to be as comprehensive as possible, a university librarian (SMC) was recruited to develop and  
388 run the online database searches. There were other limitations identified during development of the  
389 search and sorting of the publications. Firstly, some countries (such as China), do not acknowledge  
390 Indigenous peoples' existence within their borders [73] and as such, there is no reporting on their  
391 experiences. Secondly, we only included publications in English, which may have resulted in under-  
392 reporting from regions that primarily publish in other languages (e.g., Russia, Latin America, etc.).  
393 Finally, some regions (such as Sweden) do not collect data on race or ethnicity [82], which poses barriers  
394 to researchers describing and reporting about Indigenous peoples' experiences.

395 Several authors [25,26,83] either propose or stress the importance of the final stage of a scoping review:  
396 consultation. We agree that this stage is important to contextualize the findings and increase the rigor  
397 of the literature review [26]. However, we believe consultation should include the people we are talking  
398 about. Consultation with Indigenous peoples requires intentional engagement, focused on building trust  
399 and developing relationships [84,85]. This is a resource-intensive endeavor, and the timeline for  
400 engagement and consultation falls outside of typical scoping review publication timelines. As such, we  
401 plan to incorporate the findings of this review into an entire study dedicated to understanding

402 Indigenous women’s experiences with pelvic health conditions in northern Canada using community-  
403 based participatory principles and a trauma-informed framework. The findings of this work will be  
404 shared in future publications.

## 405 **Supporting Information**

406 **S1 Appendix. Primary literature database search strategies.**

407 **S2 Checklist. PRISMA-S checklist.**

408 **S3 Dataset. Dataset extracted from included full texts.**

## 409 **References**

- 410 1. Bradbury-Jones C, Aveyard H, Herber OR, Isham L, Taylor J, O’Malley L. Scoping reviews: The  
411 PAGER framework for improving the quality of reporting. *Int J Soc Res Methodol*. 2021;
- 412 2. United Nations Permanent Forum on Indigenous Issues. Indigenous peoples, Indigenous voices  
413 factsheet: Who are indigenous peoples? [Internet]. Available from:  
414 [https://www.un.org/esa/socdev/unpfii/documents/5session\\_factsheet1.pdf](https://www.un.org/esa/socdev/unpfii/documents/5session_factsheet1.pdf)
- 415 3. Nguyen NH, Subhan FB, Williams K, Chan CB. Barriers and mitigating strategies to healthcare  
416 access in Indigenous communities of Canada: A narrative review. *Healthcare (Basel)*. 2020 Jun  
417 1;8(2).
- 418 4. Nolan-Isles D, Macniven R, Hunter K, Gwynn J, Lincoln M, Moir R, et al. Enablers and barriers to  
419 accessing healthcare services for Aboriginal people in New South Wales, Australia. *Int J Environ  
420 Res Public Health*. 2021 Mar 2;18(6):1–13.

- 421 5. Sannhet og forsoning – grunnlag for et oppgjør med fornorskingspolitikk og urett mot samer,  
422 kvener/norskfinner og skogfinner [Internet]. 2023 Jan. Available from:  
423 [https://www.stortinget.no/globalassets/pdf/sannhets--og-forsoningskommisjonen/rapport-til-](https://www.stortinget.no/globalassets/pdf/sannhets--og-forsoningskommisjonen/rapport-til-stortinget-fra-sannhets--og-forsoningskommisjonen.pdf)  
424 [stortinget-fra-sannhets--og-forsoningskommisjonen.pdf](https://www.stortinget.no/globalassets/pdf/sannhets--og-forsoningskommisjonen/rapport-til-stortinget-fra-sannhets--og-forsoningskommisjonen.pdf)
- 425 6. First Nations Health Authority. FNHA’s policy statement on cultural safety and humility: “it starts  
426 with me” [Internet]. Vancouver, British Columbia, Canada; [cited 2024 Jun 26]. Available from:  
427 <https://www.fnha.ca/documents/fnha-policy-statement-cultural-safety-and-humility.pdf>
- 428 7. Phillips B, Daniels J, Woodward A, Blakely T, Taylor R, Morrell S. Mortality trends in Australian  
429 Aboriginal peoples and New Zealand Maori. *Popul Health Metr*. 2017 Jul 4;15(1).
- 430 8. Christensen M, Kightlinger L. Premature mortality patterns among American Indians in South  
431 Dakota, 2000-2010. *Am J Prev Med*. 2013 May;44(5):465–71.
- 432 9. Park J. Mortality among First Nations people, 2006 to 2016. *Health Rep*. 2021;32(10).
- 433 10. Truth and Reconciliation Commission of Canada. Truth and reconciliation commission of Canada:  
434 calls to action. 2015.
- 435 11. Reconciliation Australia. 2021 state of reconciliation in Australia report: moving from safe to  
436 brave. 2021.
- 437 12. United Nations. United Nations Declaration on the Rights of Indigenous Peoples.  
438 [https://www.un.org/development/desa/indigenouspeoples/wp-](https://www.un.org/development/desa/indigenouspeoples/wp-content/uploads/sites/19/2018/11/UNDRIP_E_web.pdf)  
439 [content/uploads/sites/19/2018/11/UNDRIP\\_E\\_web.pdf](https://www.un.org/development/desa/indigenouspeoples/wp-content/uploads/sites/19/2018/11/UNDRIP_E_web.pdf); Sep 7, 2007.
- 440 13. World Health Organization. The health of Indigenous peoples. WHA76.16 Seventy-Sixth World  
441 Health Assembly; May 30, 2023 p. 1–4.

- 442 14. Shaw C, Cahill J, Wagg A. The current state of continence in Canada: A population representative  
443 epidemiological survey. *Can J Urol*. 2020;27(4):10300–5.
- 444 15. Vogel JP, Jung J, Lavin T, Simpson G, Kluwgant D, Abalos E, et al. Neglected medium-term and  
445 long-term consequences of labour and childbirth: a systematic analysis of the burden,  
446 recommended practices, and a way forward. *Lancet Glob Health*. 2024 Feb 1;12(2):e317–30.
- 447 16. Palmieri S, De Bastiani SS, Degliuomini R, Ruffolo AF, Casiraghi A, Vergani P, et al. Prevalence and  
448 severity of pelvic floor disorders in pregnant and postpartum women. *International Journal of*  
449 *Gynecology and Obstetrics*. 2022 Aug 1;158(2):346–51.
- 450 17. Peinado-Molina RA, Hernández-Martínez A, Martínez-Vázquez S, Rodríguez-Almagro J, Martínez-  
451 Galiano JM. Pelvic floor dysfunction: prevalence and associated factors. *BMC Public Health*. 2023  
452 Dec 1;23(1).
- 453 18. Wu JM, Vaughan CP, Goode PS, Redden DT, Burgio KL, Richter HE, et al. Prevalence and trends of  
454 symptomatic pelvic floor disorders in U.S. women. *Obstetrics and Gynecology*. 2014;123(1):141–  
455 8.
- 456 19. Wu JM, Hundley AF, Fulton RG, Myers ER. Forecasting the prevalence of pelvic floor disorders in  
457 U.S. women 2010 to 2050. *Obstetrics & Gynecology*. 2009;114(6):1278–83.
- 458 20. Berry SH, Elliott MN, Suttorp M, Bogart LM, Stoto MA, Eggers P, et al. Prevalence of symptoms of  
459 bladder pain syndrome/interstitial cystitis among adult females in the United States. *Journal of*  
460 *Urology*. 2011 Aug;186(2):540–4.
- 461 21. Gurayah AA, Satish S, Yarborough CC, Perez N, Amin K, Enemchukwu EA, et al. Pelvic floor  
462 disorders among minority women: differences in prevalence, severity and health-related social  
463 needs. *Urology*. 2024 Apr 1;186:147–53.

- 464 22. Grimes CL, Clare CA, Meriwether K V., Husk K, Rogers RG. Inadequacy and underreporting of  
465 study subjects' race and ethnicity in federally funded pelvic floor research. *Am J Obstet Gynecol.*  
466 2021 Nov 1;225(5):562.e1-562.e6.
- 467 23. Brown O, Siddique M, Mou T, Boniface ER, Volpe KA, Cichowski S. Disparity of racial/ethnic  
468 representation in publications contributing to overactive bladder diagnosis and treatment  
469 guidelines. *Female Pelvic Med Reconstr Surg.* 2021 Sep 1;27(9):541–6.
- 470 24. Gonzalez G, Dallas K, Arora A, Kobashi KC, Anger JT. Underrepresentation of racial and ethnic  
471 diversity in research informing the American Urological Association/Society of Urodynamics,  
472 Female Pelvic Medicine & Urogenital Reconstruction Stress Urinary Incontinence Guideline.  
473 *Urology.* 2022 May 1;163:16–21.
- 474 25. Arksey H, O'Malley L. Scoping studies: Towards a methodological framework. *International*  
475 *Journal of Social Research Methodology: Theory and Practice.* 2005 Feb;8(1):19–32.
- 476 26. Levac D, Colquhoun H, O'Brien KK. Scoping studies: Advancing the methodology. *Implementation*  
477 *Science.* 2010;5(69).
- 478 27. Campbell SM. Filter to Retrieve Studies Related to Indigenous People of the United States from  
479 the OVID Medline Database [Internet]. John W. Scott Health Sciences Library, University of  
480 Alberta. Rev. Sept 19, 2021. Available from:  
481 [https://docs.google.com/document/d/118tP1FvgQ1hRROjl1QroLjM-u8WN\\_uS6Nafis6s37jk/edit](https://docs.google.com/document/d/118tP1FvgQ1hRROjl1QroLjM-u8WN_uS6Nafis6s37jk/edit)
- 482 28. Campbell SM. Filter to Retrieve Studies Related Indigenous Peoples of South America from the  
483 OVID Medline Database [Internet]. John W. Scott Health Sciences Library, University of Alberta.  
484 Rev. August 11, 2022. Available from:

485 <https://docs.google.com/document/d/1jrtRHxV4DeQHG2PqNDSN9W2qMqbvme8E8DG3gq2Anc>

486 8/edit

487 29. Campbell SM. A Filter to Retrieve Studies Related to Sami People from the Ovid MEDLINE

488 Database [Internet]. John W. Scott Health Sciences Library, University of Alberta. Rev. May 1,

489 2020. Available from:

490 [https://docs.google.com/document/d/1w\\_InUXzOZF3cYdwykIRs\\_ADg0aDQeUY-](https://docs.google.com/document/d/1w_InUXzOZF3cYdwykIRs_ADg0aDQeUY-EfcZvy9Gayw/edit#)

491 [EfcZvy9Gayw/edit#](https://docs.google.com/document/d/1w_InUXzOZF3cYdwykIRs_ADg0aDQeUY-EfcZvy9Gayw/edit#)

492 30. Campbell SM. Filter to Retrieve Studies Related to Indigenous People of the Russian Region in the

493 OVID Medline Database [Internet]. John W. Scott Health Sciences Library, University of Alberta.

494 Rev. August 11, 2022. Available from: [https://docs.google.com/document/d/1caZ5s-](https://docs.google.com/document/d/1caZ5s-CTcl81NHosD3FDB7x5G_wUsOsHk__YlviJNEg/edit#)

495 [CTcl81NHosD3FDB7x5G\\_wUsOsHk\\_\\_YlviJNEg/edit#](https://docs.google.com/document/d/1caZ5s-CTcl81NHosD3FDB7x5G_wUsOsHk__YlviJNEg/edit#)

496 31. Campbell SM. A Filter to Retrieve Studies Related to Pacific Island People from the Ovid MEDLINE

497 Database [Internet]. John W. Scott Health Sciences Library, University of Alberta. Rev. May 1,

498 2020. Available from:

499 [https://docs.google.com/document/d/1QRRZaDGRJ6NhxduojkWw3bFr\\_SOJChazNVVEI2zy9mY/e](https://docs.google.com/document/d/1QRRZaDGRJ6NhxduojkWw3bFr_SOJChazNVVEI2zy9mY/edit#)

500 [dit#](https://docs.google.com/document/d/1QRRZaDGRJ6NhxduojkWw3bFr_SOJChazNVVEI2zy9mY/edit#)

501 32. Campbell SM. Filter to Retrieve Studies Related Indigenous People of the Middle East from the

502 OVID Medline Database [Internet]. John W. Scott Health Sciences Library, University of Alberta.

503 Rev. August 16, 2022. Available from:

504 [https://docs.google.com/document/d/1yHYmGlcFvOFNnlxDP0stgpNRBr8Bwk2ren1E7xFzGk4/edi](https://docs.google.com/document/d/1yHYmGlcFvOFNnlxDP0stgpNRBr8Bwk2ren1E7xFzGk4/edit#)

505 [t](https://docs.google.com/document/d/1yHYmGlcFvOFNnlxDP0stgpNRBr8Bwk2ren1E7xFzGk4/edit#)

506 33. Campbell SM. A Filter to Retrieve Studies Related to Maori People from the Ovid MEDLINE

507 Database [Internet]. John W. Scott Health Sciences Library, University of Alberta. Rev. April 13,



- 508 2022. Available from:
- 509 [https://docs.google.com/document/d/1AyTKFnQtJ3THHxporefpsFovNox\\_G4HeqvlqVdgbval/edit](https://docs.google.com/document/d/1AyTKFnQtJ3THHxporefpsFovNox_G4HeqvlqVdgbval/edit)
- 510 #
- 511 34. Campbell SM. Filter to Retrieve Studies Related to Indigenous People of Mexico in the OVID
- 512 Medline Database [Internet]. John W. Scott Health Sciences Library, University of Alberta. Rev.
- 513 August 10, 2022. Available from:
- 514 <https://docs.google.com/document/d/1ixKH9Fnz44pPOCyawFpsL0jOXtKRH4Lf8lxVloKkvZA/edit>
- 515 35. Campbell SM. Filter to Retrieve Studies Related to Indigenous People of the Indian Sub-continent
- 516 in the OVID Medline Database [Internet]. John W. Scott Health Sciences Library, University of
- 517 Alberta. Rev. August 11, 2022. Available from:
- 518 [https://docs.google.com/document/d/1UwIGk5qwzCEcaNXKfHADIGyABQ0AEhbQ17eYVMrYH3A](https://docs.google.com/document/d/1UwIGk5qwzCEcaNXKfHADIGyABQ0AEhbQ17eYVMrYH3A/edit#)
- 519 [/edit#](https://docs.google.com/document/d/1UwIGk5qwzCEcaNXKfHADIGyABQ0AEhbQ17eYVMrYH3A/edit#)
- 520 36. Campbell SM. Filter to Retrieve Studies Related Indigenous People of Greenland from the OVID
- 521 Medline Database [Internet]. John W. Scott Health Sciences Library, University of Alberta. Rev.
- 522 August 12, 2022. Available from:
- 523 [https://docs.google.com/document/d/1HbhlpbQklmT6yWa9CRTVnNthr8xye33\\_PnileEvWcXE/edit](https://docs.google.com/document/d/1HbhlpbQklmT6yWa9CRTVnNthr8xye33_PnileEvWcXE/edit)
- 524 t
- 525 37. Campbell SM. Filter to Retrieve Studies Related to Indigenous People of Central America in the
- 526 OVID Medline Database [Internet]. John W. Scott Health Sciences Library, University of Alberta.
- 527 Rev. August 27, 2022. Available from: [https://docs.google.com/document/d/15CA-9QPLD-](https://docs.google.com/document/d/15CA-9QPLD-W8peKp2tEbYoBuKh3ycq3sdAYYiKcEimk/edit)
- 528 [W8peKp2tEbYoBuKh3ycq3sdAYYiKcEimk/edit](https://docs.google.com/document/d/15CA-9QPLD-W8peKp2tEbYoBuKh3ycq3sdAYYiKcEimk/edit)
- 529 38. Campbell SM. A Filter to Retrieve Studies Related to Indigenous People of Australia and the
- 530 Torres Strait Islands from the Ovid MEDLINE Database. [Internet]. John W. Scott Health Sciences

- 531 Library, University of Alberta. Rev. March 13, 2022. Available from:  
532 [https://docs.google.com/document/d/15g260L\\_hRkGyCh-iygS\\_QHl1cvGlSsphd5XwlrSk2Tg/edit#](https://docs.google.com/document/d/15g260L_hRkGyCh-iygS_QHl1cvGlSsphd5XwlrSk2Tg/edit#)
- 533 39. Campbell SM. A Filter to Retrieve Studies Related to African Indigenous People from the OVID  
534 Medline Database [Internet]. John W. Scott Health Sciences Library. University of Alberta. Rev.  
535 August 9, 2022. Available from:  
536 [https://docs.google.com/document/d/1tGwygpqck1MT1SYGCa4KK8yl8-](https://docs.google.com/document/d/1tGwygpqck1MT1SYGCa4KK8yl8-Vq88NXD_Av9WL8B5w/edit)  
537 [Vq88NXD\\_Av9WL8B5w/edit](https://docs.google.com/document/d/1tGwygpqck1MT1SYGCa4KK8yl8-Vq88NXD_Av9WL8B5w/edit)
- 538 40. Campbell SM, Dorgan M, Tjosvold L. Filter to Retrieve Studies Related to Indigenous People of  
539 Canada the OVID Medline Database [Internet]. John W. Scott Health Sciences Library, University  
540 of Alberta. Rev. May 5, 2022. Available from:  
541 [https://docs.google.com/document/d/1XqpWHN7hrFlyNwaqucRFRXaCnBOaeshFw4SR31Uxyek/](https://docs.google.com/document/d/1XqpWHN7hrFlyNwaqucRFRXaCnBOaeshFw4SR31Uxyek/edit)  
542 [edit](https://docs.google.com/document/d/1XqpWHN7hrFlyNwaqucRFRXaCnBOaeshFw4SR31Uxyek/edit)
- 543 41. International Continence Society. Incontinence: 6th Edition 2017. Abrams P, Cardozo L, Wagg A,  
544 Wein A, editors. Tokyo; 2017.
- 545 42. Covidence systematic review software [Internet]. Melbourne: Veritas Health Innovation; 2022.  
546 Available from: Available at [www.covidence.org](http://www.covidence.org)
- 547 43. Tahatikonhsontóntie' Quebec Network for Indigenous Health Research — Qc-NEIHR. Cultural  
548 safety in an Indigenous health research context: final report of the roundtable discussions  
549 [Internet]. Kahnawá:ke; 2024. Available from:  
550 [https://www.mcgill.ca/familymed/files/familymed/cultural\\_safety\\_report\\_en\\_-\\_final.pdf](https://www.mcgill.ca/familymed/files/familymed/cultural_safety_report_en_-_final.pdf)

- 551 44. Curtis E, Jones R, Tipene-Leach D, Walker C, Loring B, Paine SJ, et al. Why cultural safety rather  
552 than cultural competency is required to achieve health equity: A literature review and  
553 recommended definition. *Int J Equity Health*. 2019 Nov 14;18(1).
- 554 45. Watson K, White C, Hall H, Hewitt A. Women’s experiences of birth trauma: A scoping review.  
555 *Women and Birth*. 2021 Sep 1;34(5):417–24.
- 556 46. Lindsay M. A Survey of Survivors of Sexual Violence in the Northwest Territories [Internet]. 2014  
557 [cited 2022 Nov 23]. Available from: [https://www.justice.gc.ca/eng/rp-pr/cj-  
jp/victim/rr13\\_04/p1.html](https://www.justice.gc.ca/eng/rp-pr/cj-<br/>558 jp/victim/rr13_04/p1.html)
- 559 47. Cichowski SB, Dunivan GC, Komesu YM, Rogers RG. Sexual abuse history and pelvic floor  
560 disorders in women. *South Med J*. 2013 Dec;106(12):675–8.
- 561 48. van der Kolk BA. The body keeps the score: Memory and the evolving psychobiology of post  
562 traumatic stress. Vol. 1, *Harvard Review of Psychiatry*. Informa Healthcare; 1994. p. 253–65.
- 563 49. Maynard BR, Farina A, Dell NA, Kelly MS. Effects of trauma-informed approaches in schools: A  
564 systematic review. Vol. 15, *Campbell Systematic Reviews*. Wiley Blackwell; 2019.
- 565 50. Public Health Agency of Canada. Government of Canada. 2018. Trauma and violence-informed  
566 approaches to policy and practice. Available from: [https://www.canada.ca/en/public-  
health/services/publications/health-risks-safety/trauma-violence-informed-approaches-policy-  
practice.html](https://www.canada.ca/en/public-<br/>567 health/services/publications/health-risks-safety/trauma-violence-informed-approaches-policy-<br/>568 practice.html)
- 569 51. Tricco AC, Lillie E, Zarin W, O’Brien KK, Colquhoun H, Levac D, et al. PRISMA extension for scoping  
570 reviews (PRISMA-ScR): Checklist and explanation. *Ann Intern Med*. 2018 Oct 2;169(7):467–73.

- 571 52. Silva CJ de A, Neves Júnior TT das, Carvalho EA de, Silva VGF da, Almeida SGP de, Menezes RMP  
572 de. Profile of nursing diagnoses in indigenous older adults in the community: a cross-sectional  
573 study. *Rev Bras Enferm.* 2021;75(2):e20210128.
- 574 53. Gibson W, Kolahdooz F, Laboucan M, Otway M, Wagg A, Sharma S. Urinary incontinence in  
575 Indigenous seniors in northern Canada [Conference presentation]. In *International Continence*  
576 *Society 2020 Online*; 2020 [cited 2022 Jun 21]. Available from:  
577 <https://www.ics.org/2020/abstract/185>
- 578 54. Mack I, Hahn H, Gödel C, Enck P, Bharucha AE. Global prevalence of fecal incontinence in  
579 community-dwelling adults: A systematic review and meta-analysis. *Clinical Gastroenterology*  
580 *and Hepatology.* 2024 Apr 1;22(4):712-731.e8.
- 581 55. Mou T, Warner K, Brown O, Yeh C, Beestrup M, Kenton K, et al. Prevalence of pelvic organ  
582 prolapse among US racial populations: A systematic review and meta-analysis of population-  
583 based screening studies. Vol. 40, *Neurourology and Urodynamics.* John Wiley and Sons Inc; 2021.  
584 p. 1098–106.
- 585 56. Addisu D, Mekie M, Belachew YY, Degu A, Gebeyehu NA. The prevalence of pelvic organ prolapse  
586 and associated factors in Ethiopia: a systematic review and meta-analysis. Vol. 10, *Frontiers in*  
587 *Medicine.* Frontiers Media SA; 2023.
- 588 57. Mitchell KR, Geary R, Graham CA, Datta J, Wellings K, Sonnenberg P, et al. Painful sex  
589 (dyspareunia) in women: Prevalence and associated factors in a British population probability  
590 survey. *BJOG.* 2017 Oct 1;124(11):1689–97.

- 591 58. Banaei M, Kariman N, Ozgoli G, Nasiri M, Ghasemi V, Khiabani A, et al. Prevalence of postpartum  
592 dyspareunia: A systematic review and meta-analysis. Vol. 153, International Journal of  
593 Gynecology and Obstetrics. John Wiley and Sons Ltd; 2021. p. 14–24.
- 594 59. Mili N, Paschou SA, Armeni A, Georgopoulos N, Goulis DG, Lambrinouadaki I. Genitourinary  
595 syndrome of menopause: a systematic review on prevalence and treatment. Menopause. 2021  
596 Jun 15;28(6):706–16.
- 597 60. Touza KK, Rand KL, Carpenter JS, Chen CX, Heit MH. A scoping study of psychosocial factors in  
598 women diagnosed with and/or treated for pelvic organ prolapse. Female Pelvic Med Reconstr  
599 Surg. 2020 May 1;26(5):327–48.
- 600 61. McKernan LC, Walsh CG, Reynolds WS, Crofford LJ, Dmochowski RR, Williams DA. Psychosocial  
601 co-morbidities in interstitial cystitis/bladder pain syndrome (IC/BPS): A systematic review.  
602 Neurourol Urodyn. 2018 Mar 1;37(3):926–41.
- 603 62. Coyne KS, Kvasz M, Ireland AM, Milsom I, Kopp ZS, Chapple CR. Urinary incontinence and its  
604 relationship to mental health and health-related quality of life in men and women in Sweden, the  
605 United Kingdom, and the United States. Eur Urol. 2012;61(1):88–95.
- 606 63. Merone L, Tsey K, Russell D, Nagle C. Sex Inequalities in medical research: A systematic scoping  
607 review of the literature. Women’s Health Reports. 2022 Jan 1;3(1):49–59.
- 608 64. Saini M. A systematic review of western and Aboriginal research designs assessing cross-  
609 validation to explore compatibility and convergence [Internet]. 2012. Available from:  
610 [www.nccah-ccnsa.ca](http://www.nccah-ccnsa.ca).
- 611 65. Akanle O, Ademuson A, Adegoke O. Worldviews on erectile dysfunction: perspectives in  
612 knowledge systems and development. Gender & Behaviour. 2020;17(4):13982–94.

- 613 66. Cabada-Aguirre P, López López AM, Mendoza KCO, Garay Buenrostro KD, Luna-Vital DA, Mahady  
614 GB. Mexican traditional medicines for women's reproductive health. *Sci Rep*. 2023 Dec 1;13(1).
- 615 67. Alinsug M V., Estandarte MHG, Somodio EMN, Sabarita MJJ, Deocaris CC. Biodiversity of  
616 ethnomedicinal plants from the B'laan Tribe in Mount Matutum Protected Landscape, Southern  
617 Mindanao, Philippines. *Biodiversitas*. 2022 Jan 1;23(1):554–63.
- 618 68. Agunbiade OM, Ayotunde T. Ageing, sexuality and enhancement among Yoruba people in south  
619 western Nigeria. *Cult Health Sex*. 2012 Jun;14(6):705–17.
- 620 69. Statistics Canada. Census Profile, 2016 Census - Northwest Territories [Territory] and Canada  
621 [Country] [Internet]. 2017. Available from: [https://www12.statcan.gc.ca/census-  
recensement/2016/dp-  
pd/prof/details/page.cfm?Lang=E&Geo1=PR&Code1=61&Geo2=PR&Code2=01&SearchText=Nort  
hwest+Territories&SearchType=Begins&SearchPR=01&B1=Aboriginal%20peoples&TABID=1&typ  
e=0&](https://www12.statcan.gc.ca/census-<br/>622 recensement/2016/dp-<br/>623 pd/prof/details/page.cfm?Lang=E&Geo1=PR&Code1=61&Geo2=PR&Code2=01&SearchText=Nort<br/>624 hwest+Territories&SearchType=Begins&SearchPR=01&B1=Aboriginal%20peoples&TABID=1&typ<br/>625 e=0&)
- 626 70. Statistics Canada. Census Profile, 2016 Census - Nunavut [Territory] and Canada [Country]  
627 [Internet]. 2017. Available from: [https://www12.statcan.gc.ca/census-  
recensement/2016/dp-  
pd/prof/details/page.cfm?LANG=E&GENDERlist=1,2,3&STATISTIClist=1,4&DGUIDlist=2021A0002  
60&HEADERlist=19&SearchText=Yukon](https://www12.statcan.gc.ca/census-<br/>628 recensement/2016/dp-<br/>629 pd/prof/details/page.cfm?Lang=E&Geo1=PR&Code1=62&Geo2=PR&Code2=01&SearchText=Nun<br/>630 avut&SearchType=Begins&SearchPR=01&B1=Aboriginal%20peoples&TABID=1&type=1<br/>631 https://www12.statcan.gc.ca/census-<br/>632 recensement/2016/dp-<br/>633 pd/prof/details/page.cfm?LANG=E&GENDERlist=1,2,3&STATISTIClist=1,4&DGUIDlist=2021A0002<br/>634 60&HEADERlist=19&SearchText=Yukon)

- 635 72. Rezal A. The states where the most Native Americans live. US News [Internet]. 2021 Nov 26 [cited  
636 2024 Jun 26]; Available from: [https://www.usnews.com/news/best-states/articles/the-states-  
637 where-the-most-native-americans-live](https://www.usnews.com/news/best-states/articles/the-states-where-the-most-native-americans-live)
- 638 73. The Indigenous World 2024: China - IWGIA - International Work Group for Indigenous Affairs  
639 [Internet]. [cited 2024 Jun 18]. Available from: [https://www.iwgia.org/en/china/5365-iw-2024-  
640 china.html](https://www.iwgia.org/en/china/5365-iw-2024-china.html)
- 641 74. Meyer I, Richter HE. Impact of fecal incontinence and its treatment on quality of life in women.  
642 *Women's Health*. 2015 Mar 1;11(2):225–38.
- 643 75. De Luca DA, Papara C, Vorobyev A, Staiger H, Bieber K, Thaçi D, et al. Lichen sclerosus: The 2023  
644 update. Vol. 10, *Frontiers in Medicine*. Frontiers Media S.A.; 2023.
- 645 76. The Canadian Continence Foundation. The impact of incontinence in Canada: A briefing  
646 document for policy-makers [Internet]. 2014 Dec [cited 2024 Jun 26]. Available from:  
647 <https://www.canadiancontinence.ca/pdfs/en-impact-of-incontinence-in-canada-2014.pdf>
- 648 77. Wagner TH, Moore KH, Subak LL, de Wachter S, Dudding T. Economics of urinary & fecal  
649 incontinence, and prolapse. In: Abrams P, Cardozo L, Wagg A, Wein A, editors. *Incontinence: 6th  
650 Edition 2017*. Tokyo; 2017. p. 2479–511.
- 651 78. Jefferson K, Stanhope KK, Jones-Harrell C, Vester A, Tyano E, Xavier Hall CD. A scoping review of  
652 recommendations in the English language on conducting research with trauma-exposed  
653 populations since publication of the Belmont report; thematic review of existing  
654 recommendations on research with trauma-exposed populations. *PLoS One*. 2021 Jul 1;16(7).
- 655 79. Kuoch KL, rey Hebbard GS, O HE, Austin DW, Knowles SR. Urinary and faecal incontinence:  
656 Psychological factors and management recommendations. *NZMJ*. 2019;132:1503.

- 657 80. Siddiqui NY, Wiseman JB, Cella D, Bradley CS, Lai HH, Helmuth ME, et al. Mental health, sleep and  
658 physical function in treatment seeking women with urinary incontinence. *Journal of Urology*.  
659 2018 Oct 1;200(4):848–55.
- 660 81. Harding L, Marra CJ, Illes J. Establishing a comprehensive search strategy for Indigenous health  
661 literature reviews. *Syst Rev*. 2021 Dec 1;10(1).
- 662 82. Al-Zubaidi Y. Racial and ethnic statistics in Sweden: Has the socialization process started yet? In:  
663 *Scandinavian Studies in Law* [Internet]. 2022 [cited 2024 Jun 14]. p. 425–50. Available from:  
664 <https://www.scandinavianlaw.se/>
- 665 83. Bassett R, McGibbon E. A critical participatory and collaborative method for scoping the  
666 literature. *Qual Quant*. 2013;47(6):3249–59.
- 667 84. Wilson S. What is an indigenous research methodology. *Canadian Journal of Native Education*.  
668 2001;25(2):175.
- 669 85. Brant Castellano M. Ethics of Aboriginal research. *J Aborig Health*. 2004;98–114.
- 670



## Identification

References from electronic databases/registers (Embase, Global Health, CINAHL, Scopus, MEDLINE, ProQuest Dissertations and Theses Global, Cochrane Library, PROSPERO)

(n = 2894)

References from other sources  
(n = 92)

## Screening

Abstracts screened after duplicates removed

(n = 2422)

Abstracts excluded

(n = 2032)

Exclusion criteria: written in language other than English; no mention of Indigenous population; no mention of pelvic health condition

Full texts included via citation searching  
(n = 20)

Full texts assessed for eligibility

(n = 390)

Full texts excluded

(n = 147)

4 written in language other than English  
1 did not report findings  
3 unable to access full text article  
37 did not report Indigenous population  
42 did not report pelvic health condition  
60 did not link Indigenous peoples with reported pelvic health condition (e.g., prevalence, experience, etc.)

## Included

Publications included in review

(n = 243)

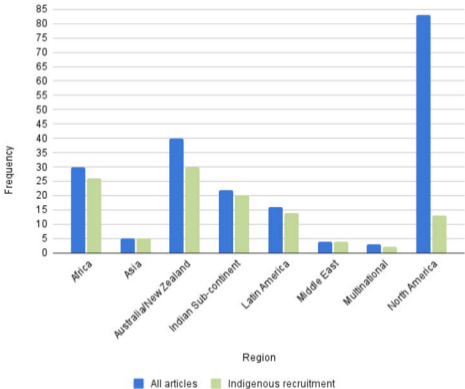

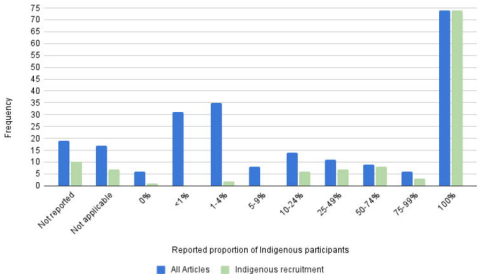

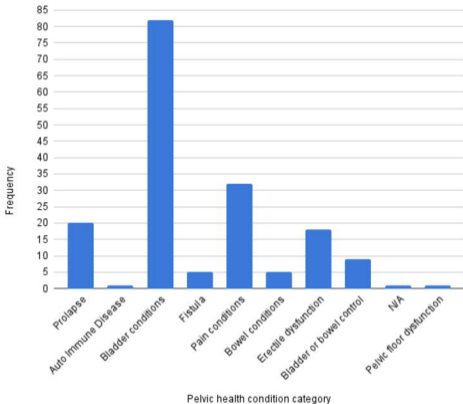

Source: https://medrxiv.org/content/10.1101/2024.07.22.24309744.full.pdf
